# Supplementary material
Source: PubMed Central journal article supplement (PMC5056805)
Supplement: NIHMS795527-supplement-01.pdf [file NIHMS795527-supplement-01.pdf]

E1

A

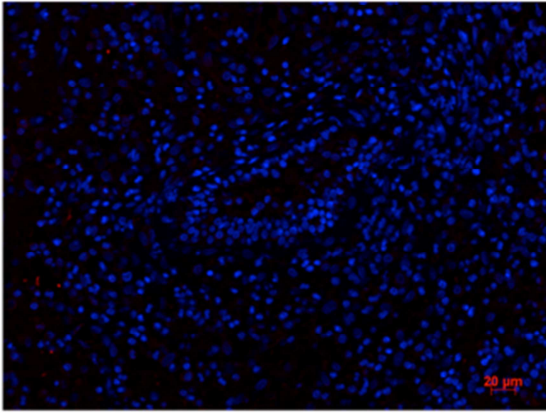

isotype

B

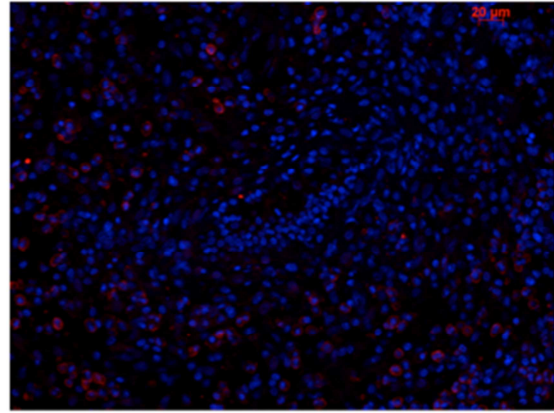

hPGDS

E2A

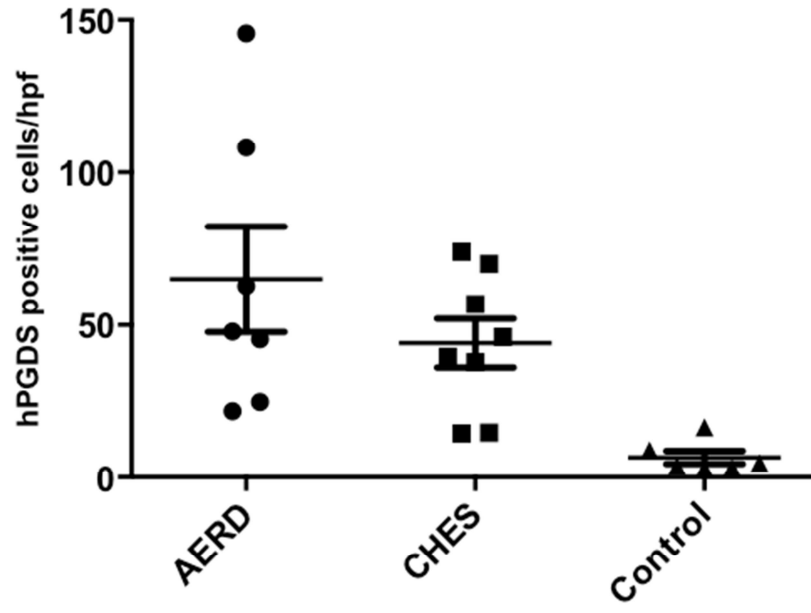

## Online Supplement:

**Table E1 Subject characteristics**

|                             | Controls (n=15) | Asthma (n=18) | AERD (n=10) |
|-----------------------------|-----------------|---------------|-------------|
| Sex (female, %)             | 9 (60%)         | 14 (78%)      | 7 (70%)     |
| Age (mean±SEM)              | 37±4            | 20±1          | 41±4        |
| Atopic Status (positive, %) | 8 (53%)         | 18 (100%)     | 4 (40%)     |

## Figure Legends

**Figure E1 Isotype control of immunofluorescence for hPGDS.** We performed immunofluorescence staining of polyp tissue as described in methods. E1A. AERD tissue was incubated with polyclonal rabbit sera and APC-labeled secondary antibody. E1B. AERD tissue was incubated with rabbit anti-hPGDS primary and APC-labeled secondary.

**Figure E2 Quantification of hPGDS positive cells detected by immunofluorescence.** Images were generated as described and analyzed by counting hPGDS positive cells and total cells (with the exclusion of epithelial and glandular cells). Dot plot showing positive hPGDS positive cells/ high-powered field (hpf) for AERD (n=7), CHES (n=8) and control tissue samples (n=6).
